# Supplementary material
Source: MDPI journal article supplement (https://www.mdpi.com/2075-4701/13/4/649)
Supplement: s1 [file s1]

Article

# Biofilm-Induced Corrosion Inhibition of Q235 Carbon Steel by *Tenacibaculum mesophilum* D-6 and *Bacillus* sp. Y-6

Xiaoxi Ruan <sup>1,2,†</sup>, Linlin Yang <sup>1,2,†</sup>, Yan Wang <sup>1,2</sup>, Yizhe Dong <sup>1,2</sup>, Dake Xu <sup>1,2,\*</sup> and Mingxing Zhang <sup>1,2,\*</sup>

<sup>1</sup> Shenyang National Laboratory for Materials Science, Northeastern University, Shenyang 110819, China

<sup>2</sup> Electrobiomaterials Institute, Key Laboratory for Anisotropy and Texture of Materials (Ministry of Education), Northeastern University, Shenyang 110819, China

\* Correspondence: xudake@mail.neu.edu.cn (D.X.); zhangmingxing@mail.neu.edu.cn (M.Z.)

† Those authors contributed equally to this work.

## Supplementary Information

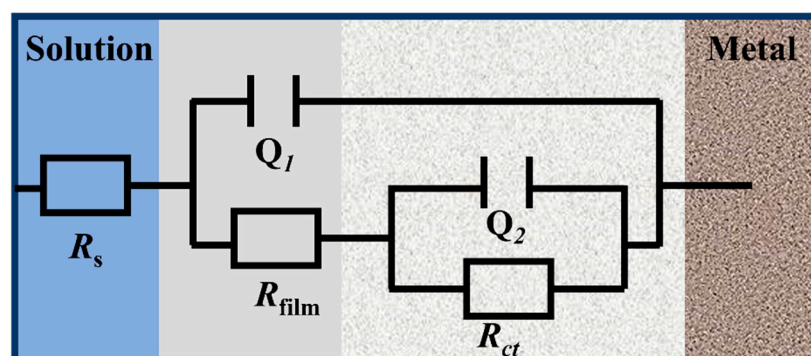

**Figure S1.** Equivalent circuits used for EIS data analysis. Herein,  $R_s$  represents the resistance of the solution,  $R_{film}$  is the resistance of the film (biofilm and corrosion products film),  $R_{ct}$  is the charge transfer resistance,  $Q_1$  is the capacitance of the film, and  $Q_2$  is the capacitance of electrical double layer.

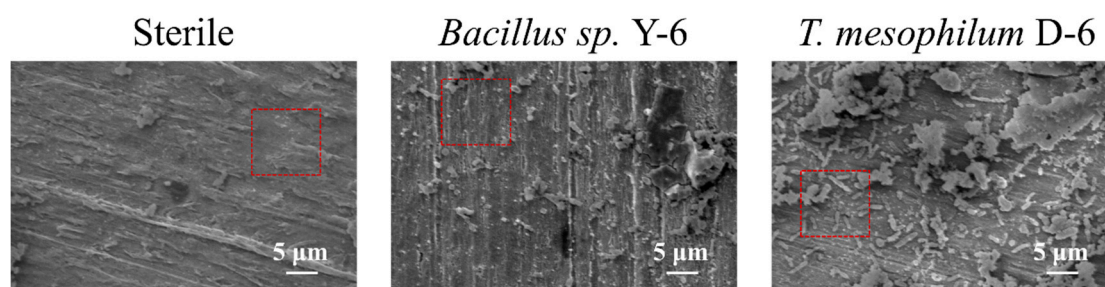

**Figure S2.** The sampling regions for EDS test.

**Table S1.** EIS parameters of Q235 coupons in different culture.

| <b>Time</b> |                         | $R_s (\Omega \cdot \text{cm}^2)$ | $Q_1 (\Omega^{-1} \cdot \text{cm}^{-2} \cdot \text{s}^n)$ | $n_1$ | $R_f (\Omega \cdot \text{cm}^2)$ | $Q_2 (\Omega^{-1} \cdot \text{cm}^{-2} \cdot \text{s}^n)$ | $n_2$ | $R_{ct} (\Omega \cdot \text{cm}^2)$ |
|-------------|-------------------------|----------------------------------|-----------------------------------------------------------|-------|----------------------------------|-----------------------------------------------------------|-------|-------------------------------------|
| 1 day       | sterile                 | 10.62                            | 0.000116                                                  | 0.97  | 69.8                             | 0.00039                                                   | 0.64  | 3911                                |
|             | <i>Bacillus</i> sp. Y-6 | 8.49                             | 0.000037                                                  | 0.99  | 88                               | 0.00017                                                   | 0.71  | 4650                                |
|             | <i>T.mesophilum</i> D-6 | 7.10                             | 0.000061                                                  | 0.95  | 6670                             | 0.00006                                                   | 0.57  | 26110                               |
| 4 day       | sterile                 | 7.52                             | 0.000013                                                  | 0.92  | 31.59                            | 0.0037                                                    | 0.80  | 6974                                |
|             | <i>Bacillus</i> sp. Y-6 | 7.75                             | 0.000077                                                  | 0.92  | 103                              | 0.00004                                                   | 0.68  | 20830                               |
|             | <i>T.mesophilum</i> D-6 | 7.06                             | 0.000069                                                  | 0.94  | 7520                             | 0.00002                                                   | 0.99  | 42290                               |
| 7 day       | sterile                 | 14.42                            | 0.003662                                                  | 0.55  | 2582                             | 0.00023                                                   | 0.99  | 24640                               |
|             | <i>Bacillus</i> sp. Y-6 | 8.15                             | 0.000099                                                  | 0.91  | 2329                             | 0.00001                                                   | 0.52  | 40930                               |
|             | <i>T.mesophilum</i> D-6 | 8.09                             | 0.000062                                                  | 0.97  | 687                              | 0.00001                                                   | 0.89  | 39510                               |
